# Supplementary figures and images for: CircRNA Expression Pattern and ceRNA and miRNA–mRNA Networks Involved in Anther Development in the CMS Line of Brassica campestris
Source: MDPI journal article supplement (doi:10.3390/ijms20194808), 2019-09-27

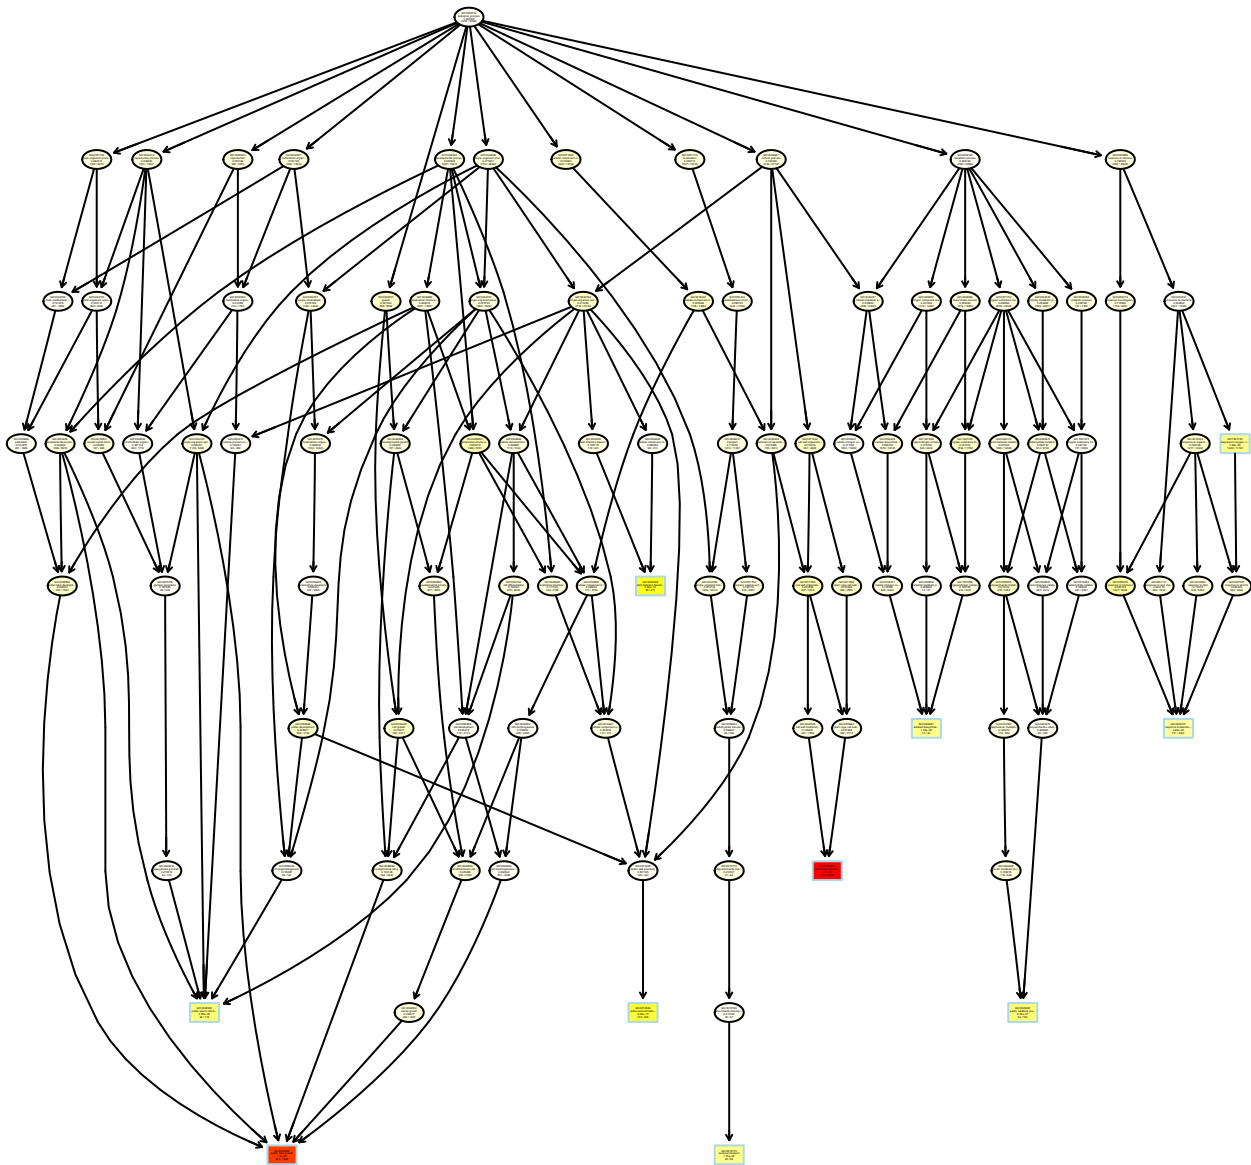

Supplement: s1 [file s1]

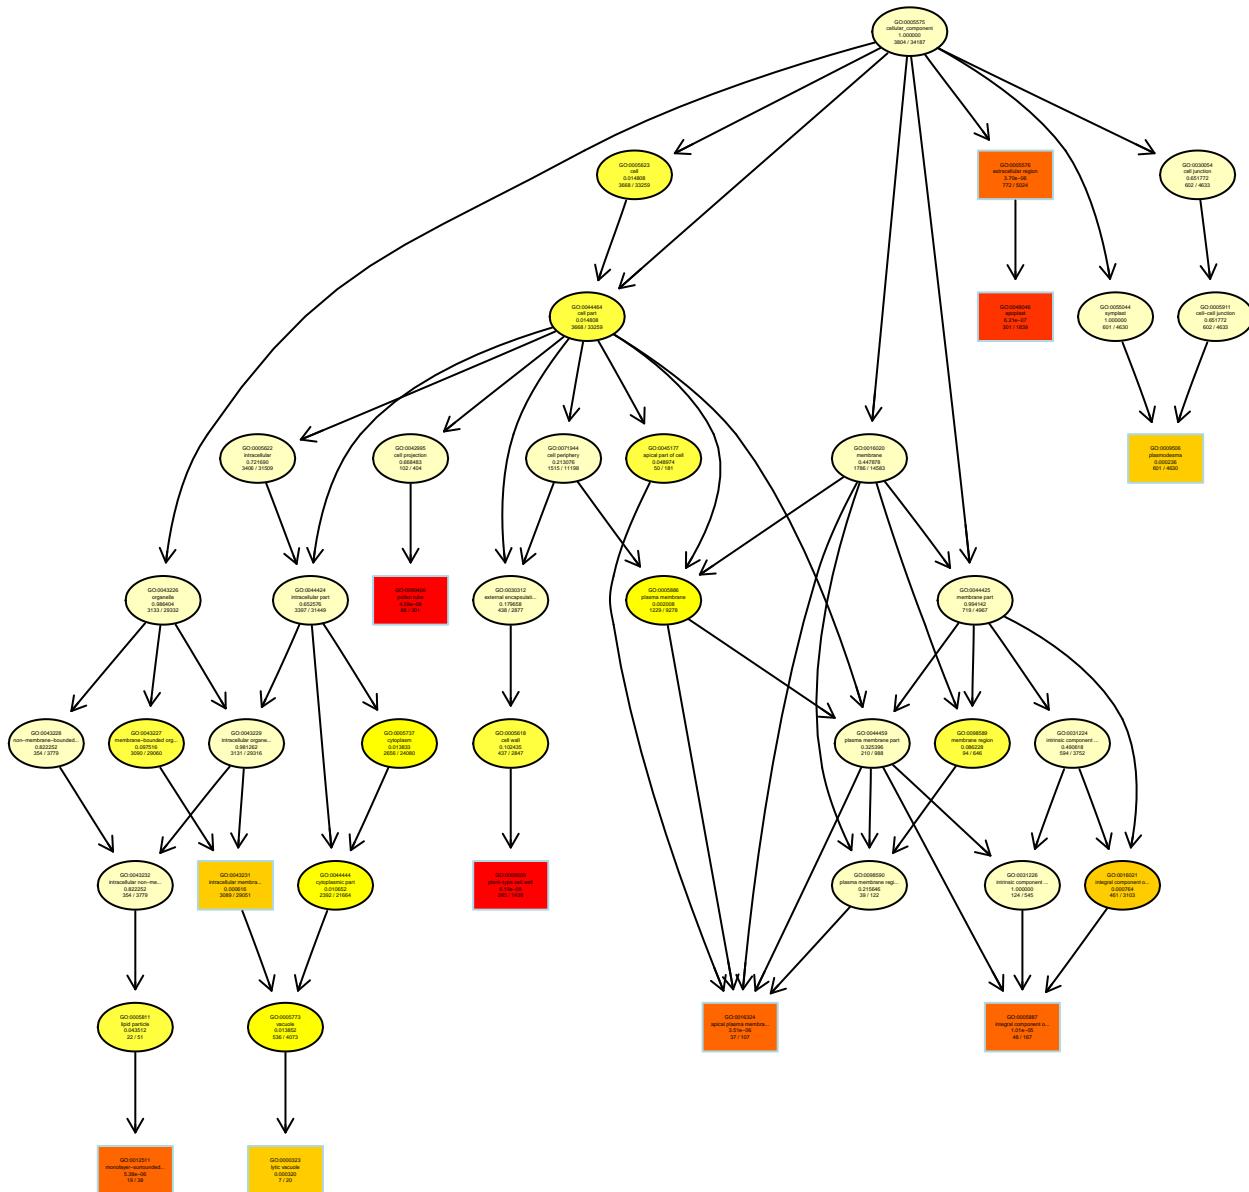

Supplement: s1 [file s1]

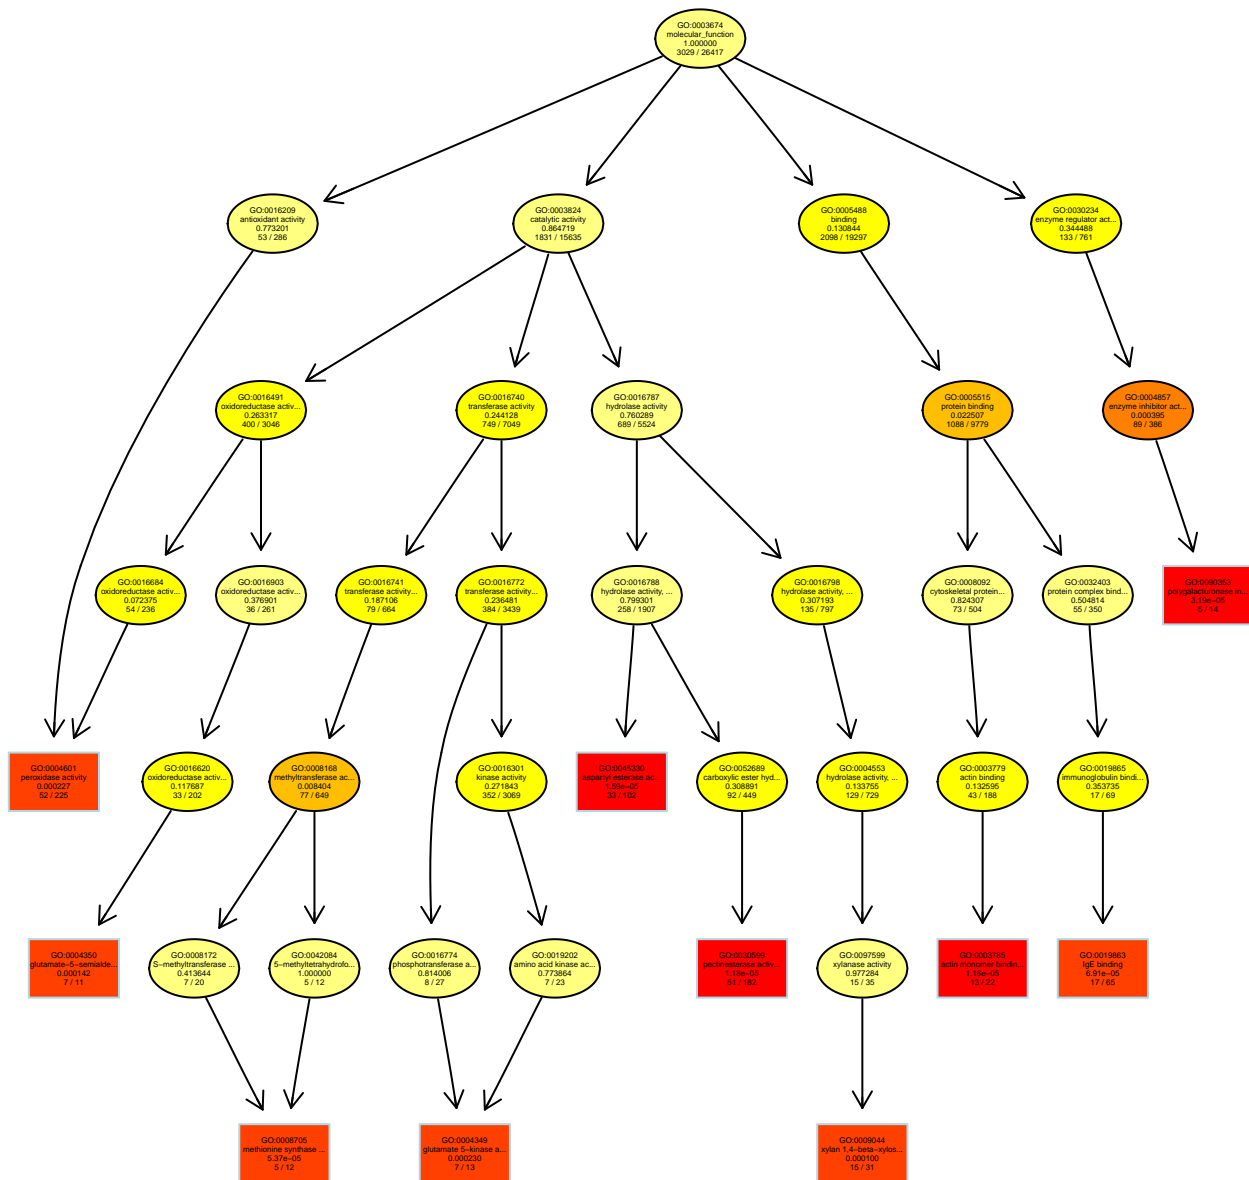

Supplement: s1 [file s1]
